# Supplementary material
Source: PubMed Central journal article supplement (PMC1895399)
Supplement: blood_2005-08-3097_1.pdf [file blood_2005-08-3097_1.pdf]

### 1. $\beta$ -globin locus

Note: all primers were designed to the single (S) allele of the  $\beta$ -globin locus, and all coordinates given represent positions in kb with respect to the transcription start site of the  $\epsilon\gamma$ -globin gene. Thus, in the sequence 5' – ACATACTTGCTTCTGACACTCCTGT – 3', the first A represents position +1.

| Primer Location                 | Forward Primer           | Reverse Primer           |
|---------------------------------|--------------------------|--------------------------|
| Mus $\beta$ -2.42               | GGATTCCACCTTGCTGTCATTAGT | AGAAATGGTCACTACTCTGCTTCC |
| Mus $\beta$ -1.22               | GGTTAGGAGCACAGAAGCCATAG  | TTGTCTCCAACCTGCCTCTG     |
| Mus $\beta$ $\epsilon\gamma$ Pr | CCAGACTTGCCATCATGGTGA    | TCACCACCAACCTCTTCAACAT   |
| Mus $\beta$ +1.31               | GGCTAGTCACTTCGCAATGAATT  | GGCATAGCGGACACACAGGAT    |
| Mus $\beta$ +2.43               | CAGACATTTGGTGTCTCGGTATGT | TGGTAGTGCTCCAGTCTCAGGA   |
| Mus $\beta$ +3.32               | GCCACTGTGCTGGTCTCTGAA    | GTCTTCTGTCTCGCTCCCTTAC   |
| Mus $\beta$ +5.14               | CGACCACTGTGCTTTTCTGTGC   | TGCCACCTGTCTGGAGAAG      |
| Mus $\beta$ +6.34               | CTCGTTTTCTCTGGACCTGTCA   | CCCACCACTGCATAATTGCC     |
| Mus $\beta$ +7.65               | TGAAGAGCAACTTAGGGTACTGG  | GGAGGATAGTTGGTAGTCTGAGT  |
| Mus $\beta$ +9.19               | CATGTTCTTTACAGCCACGCAAAT | AGGACGCTAGGACTGGATTATACA |
| Mus $\beta$ $\beta$ h1Pr+10.10  | GGACAGGTCTTCAGCCTCTTGA   | CAGATGCTTGTGATAGCTGCCT   |
| Mus $\beta$ +11.47              | TGGCAGAAGCTGGTGATTGGA    | TGGACTCAAAGAGGGCATCATAGA |
| Mus $\beta$ +15.11              | AGGCTCAAGGCTGGCTACTG     | AGGAAGAATCATGGCAATGCCTTC |
| Mus $\beta$ +16.50              | CCTGTTTCAGAATACTGACTTGGT | GGATTCATAAGAGTAGGACATGGC |
| Mus $\beta$ +18.13              | GGTGATGACTTTAATTTCTCGCA  | CCTGGTAGGATACCTTGATGTCCA |
| Mus $\beta$ +20.71              | CAGGGAGATATGTCCACCTTTG   | TCCTACTTAGAGGCTCTCTGAGAC |
| Mus $\beta$ +23.65              | TGCTCCATCTCACCTTCTCTTG   | GGCAGTGCAGTCTCCTTGACA    |
| Mus $\beta$ $\beta$ 1Pr+25.27   | CACCGAAGCCTGATCCGTAGA    | GAAGCAAATGTGAGGAGCAACTGA |
| Mus $\beta$ +26.57              | GAAGGTGGTGGCTGGAGTGG     | TGTTACAGGCAAGAGCAGGAA    |
| Mus $\beta$ +28.49              | CAGCAGCCAGATCATGCAATGT   | TCACGATGAGACAGTCAGCAGTAA |
| Mus $\beta$ +37.48              | ACAGAGACCCACAGCCAAACA    | ACTCCTACAATCTTCTCTCGTCT  |
| Mus $\beta$ +38.25              | ACAAATGGGAATAGGTGGGGACTA | TCGCTCATTCTGCTGCTTCT     |
| Mus $\beta$ $\beta$ 2Pr+39.19   | TGTTGTGTCATCTGGAAGCCTCAC | CTGCCACTCTGTCTCTCTGA     |
| Mus $\beta$ +40.69              | ATGAAGACCTTTGGGCATCTAGC  | CTCACTTCTTCCCTCCAGCAT    |
| Mus $\beta$ +44.10              | CAGTCTCAATGTGGTGATGTGTT  | CCCTTATTCTGTGTGGCTGGTATT |

### 2. $\alpha$ -Globin Locus

Coordinates given represent positions in kb with respect to the transcription start site of the  $\alpha$ -globin gene. Thus, in the sequence 5' – x – 3', the first A represents position +1. For the the  $\alpha$ Pr+7/+19 and +8/+20.9 primer sets have two coordinates because of the presence of duplicated  $\alpha$ -globin genes within the locus, which are virtually identical in sequence and cannot be distinguished by PCR.

| Primer Location                | Forward Primer            | Reverse Primer          |
|--------------------------------|---------------------------|-------------------------|
| Mus $\alpha$ $\zeta$ Pr        | TGGATTCTGTGTGGGACTAAGGC   | GGGCTTGGTGGGACTGTAAGG   |
| Mus $\alpha$ +1.4              | CTGTCTGCTGGTCACAATGGC     | AGCGTACTTCTCAGTCAGGATAG |
| Mus $\alpha$ $\alpha$ Pr+7/+19 | GCACAACCCAGCCCCAGAAT      | ACACGCCCTTGGAGCAGTTC    |
| Mus $\alpha$ +8/+20.9          | GGGCAGTAAAGACAAGGTTTCAGAG | GGAGGGCTTGGGAGGGACT     |

### 3. Other loci

| Locus                      | Forward Primer           | Reverse Primer           |
|----------------------------|--------------------------|--------------------------|
| Protamine                  | ACCAGACCATCATCACCACCAAGA | GTGCCAGGAGATCAGGAGTTCT   |
| Amylase                    | TCGTTCTGCTGCTTTCCCTCAT   | CGCTCACATTCTTGGCAATATCA  |
| T-Cell Receptor $\beta$ #1 | TCTTCCCAAGTTGCCACCCTACA  | GGACTGCTGTGTTACGGTTCA    |
| T-Cell Receptor $\beta$ #2 | CCTCAAGTCGCTTCCAACCTCAA  | CCAGGCTCAGGTAGACCAGTTACA |
